# Supplementary material
Source: PubMed Central journal article supplement (PMC4971196)
Supplement: rspb20160413supp1.pdf [file rspb20160413supp1.pdf]

## Supplementary material

for the paper “Weather explains high annual variation in butterfly dispersal” by Mikko Kuussaari, Susu Rytteri, Risto K. Heikkinen, Janne Heliölä and Peter von Bagh

Table S1. Summary of the annual mark-recapture and mobility data 2004–2015.

| Year | Marked inds | Recaptured inds |        | Recapture rate |        | Obs. movements |                 | Emigration rate |      |        | Residence time (days) |      |        | Distance moved (m) |      |        |
|------|-------------|-----------------|--------|----------------|--------|----------------|-----------------|-----------------|------|--------|-----------------------|------|--------|--------------------|------|--------|
|      |             | male            | female | male           | female | within patches | between patches | all             | male | female | all                   | male | female | all                | male | female |
| 2004 | 90          | 60              | 13     | 82.0           | 41.0   | 70             | 3               | 0.04            | 0.03 | 0.08   | 9.9                   | 11.2 | 3.8    | 88                 | 94   | 61     |
| 2005 | 56          | 23              | 10     | 66.7           | 50.0   | 30             | 3               | 0.09            | 0.13 | 0.00   | 5.9                   | 6.8  | 4.1    | 94                 | 100  | 80     |
| 2006 | 141         | 72              | 31     | 80.7           | 58.5   | 91             | 12              | 0.12            | 0.13 | 0.10   | 5.1                   | 5.3  | 4.5    | 107                | 112  | 96     |
| 2007 | 131         | 58              | 24     | 77.8           | 48.0   | 65             | 17              | 0.21            | 0.17 | 0.29   | 3.2                   | 3.1  | 3.7    | 100                | 105  | 90     |
| 2008 | 135         | 67              | 20     | 77.9           | 40.8   | 80             | 7               | 0.08            | 0.09 | 0.05   | 7.2                   | 7.2  | 7.0    | 71                 | 72   | 69     |
| 2009 | 143         | 69              | 11     | 66.7           | 28.9   | 66             | 13              | 0.16            | 0.17 | 0.18   | 6.0                   | 6.1  | 4.9    | 100                | 99   | 106    |
| 2010 | 224         | 78              | 8      | 45.8           | 10.7   | 72             | 14              | 0.16            | 0.17 | 0.13   | 6.1                   | 6.6  | 1.9    | 104                | 105  | 87     |
| 2011 | 504         | 143             | 40     | 43.4           | 27.4   | 139            | 44              | 0.24            | 0.27 | 0.13   | 1.8                   | 2.0  | 1.1    | 136                | 152  | 78     |
| 2012 | 233         | 103             | 20     | 65.4           | 28.2   | 101            | 22              | 0.18            | 0.19 | 0.10   | 6.7                   | 7.1  | 5.1    | 151                | 156  | 125    |
| 2013 | 523         | 202             | 48     | 57.8           | 30.3   | 186            | 64              | 0.26            | 0.26 | 0.23   | 4.4                   | 4.4  | 4.2    | 154                | 156  | 146    |
| 2014 | 219         | 118             | 41     | 90.0           | 59.7   | 145            | 14              | 0.09            | 0.06 | 0.17   | 6.0                   | 7.1  | 3.8    | 99                 | 100  | 94     |
| 2015 | 69          | 38              | 11     | 77.6           | 55.0   | 46             | 3               | 0.06            | 0.03 | 0.18   | 7.2                   | 7.7  | 5.3    | 107                | 94   | 151    |
| Mean | 206         | 86              | 23     | 69.3           | 39.9   | 91             | 18              | 0.14            | 0.14 | 0.14   | 5.8                   | 6.2  | 4.1    | 109                | 112  | 99     |

Table S2. Summary of the explanatory variables 2004–2015 used in the dispersal analyses.

| Year | Occupied patches | Metapop. size | Recapture rate (%) | Average temperature during flight season |                |                   | Proportion of exceptionally warm days | Mean daily rainfall (mm) | Proportion of rainy days | Average cloudiness (0-8) | Mean wind speed (m/s) | Mean daily radiation (kJ/m <sup>2</sup> ) |
|------|------------------|---------------|--------------------|------------------------------------------|----------------|-------------------|---------------------------------------|--------------------------|--------------------------|--------------------------|-----------------------|-------------------------------------------|
|      |                  |               |                    | daily maximum (C)                        | daily mean (C) | daily minimum (C) |                                       |                          |                          |                          |                       |                                           |
| 2004 | 2                | 147           | 81.1               | 18.2                                     | 13.7           | 9.0               | 0.00                                  | 3.6                      | 0.76                     | 5.1                      | 3.9                   | 18432                                     |
| 2005 | 2                | 98            | 58.9               | 21.1                                     | 16.1           | 9.8               | 0.13                                  | 2.6                      | 0.32                     | 4.2                      | 3.7                   | 22451                                     |
| 2006 | 5                | 192           | 73.0               | 22.4                                     | 16.5           | 10.0              | 0.28                                  | 0.8                      | 0.17                     | 3.7                      | 4.1                   | 23652                                     |
| 2007 | 4                | 182           | 62.6               | 21.1                                     | 15.9           | 9.6               | 0.24                                  | 1.3                      | 0.40                     | 2.7                      | 2.8                   | 27298                                     |
| 2008 | 4                | 212           | 64.4               | 19.2                                     | 14.2           | 9.3               | 0.03                                  | 3.6                      | 0.55                     | 3.7                      | 3.4                   | 20270                                     |
| 2009 | 5                | 337           | 55.9               | 19.3                                     | 14.7           | 9.2               | 0.13                                  | 0.8                      | 0.42                     | 4.0                      | 3.2                   | 20352                                     |
| 2010 | 6                | 533           | 38.4               | 19.9                                     | 15.0           | 10.0              | 0.03                                  | 1.0                      | 0.29                     | 3.7                      | 3.3                   | 21598                                     |
| 2011 | 9                | 1122          | 36.3               | 22.4                                     | 17.4           | 11.9              | 0.34                                  | 1.0                      | 0.37                     | 2.6                      | 3.1                   | 22541                                     |
| 2012 | 12               | 444           | 52.8               | 19.9                                     | 15.4           | 10.3              | 0.06                                  | 1.8                      | 0.31                     | 3.4                      | 3.2                   | 21478                                     |
| 2013 | 11               | 1041          | 47.8               | 22.4                                     | 17.7           | 11.9              | 0.22                                  | 1.6                      | 0.48                     | 3.0                      | 2.8                   | 21936                                     |
| 2014 | 9                | 294           | 72.6               | 18.2                                     | 13.9           | 9.6               | 0.16                                  | 2.4                      | 0.60                     | 4.6                      | 3.1                   | 17144                                     |
| 2015 | 4                | 112           | 71.0               | 19.4                                     | 14.7           | 10.3              | 0.07                                  | 2.7                      | 0.50                     | 3.7                      | 3.4                   | 20168                                     |
| Mean | 6.1              | 393           | 59.6               | 20.3                                     | 15.4           | 10.1              | 0.14                                  | 1.9                      | 0.43                     | 3.7                      | 3.3                   | 21443                                     |

Table S3. Pearson correlation coefficients between the explanatory variables used in the dispersal analyses ( $n = 12$  years). \*  $p < 0.05$ , \*\*  $p < 0.01$ , \*\*\*  $p < 0.001$ .

| Variable                                        | # Occupied patches | Metapopul. size | Recapture rate | Cloudiness      | Especially warm days | Daily solar radiation | Daily rainfall | Rainy days     | Mean minimum temperature | Mean maximum temperature | Mean temperature |
|-------------------------------------------------|--------------------|-----------------|----------------|-----------------|----------------------|-----------------------|----------------|----------------|--------------------------|--------------------------|------------------|
| <u>Adjusting variables</u>                      |                    |                 |                |                 |                      |                       |                |                |                          |                          |                  |
| Metapopulation size                             | <b>0.74 **</b>     |                 |                |                 |                      |                       |                |                |                          |                          |                  |
| Recapture rate                                  | -0.51              | <b>-0.77 **</b> |                |                 |                      |                       |                |                |                          |                          |                  |
| <u>Weather variables</u>                        |                    |                 |                |                 |                      |                       |                |                |                          |                          |                  |
| Average cloudiness                              | -0.44              | <b>-0.58 *</b>  | 0.65 *         |                 |                      |                       |                |                |                          |                          |                  |
| Proportion of especially warm days              | 0.33               | 0.50            | -0.29          | <b>-0.61 *</b>  |                      |                       |                |                |                          |                          |                  |
| Mean daily solar radiation (kJ/m <sup>2</sup> ) | -0.08              | 0.10            | -0.31          | <b>-0.74 **</b> | 0.55                 |                       |                |                |                          |                          |                  |
| Mean daily rainfall (mm)                        | -0.39              | -0.44           | 0.57           | 0.55            | <b>-0.63 *</b>       | -0.53                 |                |                |                          |                          |                  |
| Proportion of rainy days                        | -0.17              | -0.14           | 0.48           | 0.51            | -0.42                | <b>-0.63 *</b>        | <b>0.74 **</b> |                |                          |                          |                  |
| Mean daily minimum temperature (°C)             | <b>0.68 *</b>      | <b>0.87 ***</b> | <b>-0.64 *</b> | <b>-0.67 *</b>  | <b>0.60 *</b>        | 0.24                  | -0.39          | -0.29          |                          |                          |                  |
| Mean daily maximum temperature (°C)             | 0.27               | 0.53            | -0.48          | <b>-0.72 **</b> | <b>0.80 **</b>       | <b>0.73 **</b>        | <b>-0.59 *</b> | <b>-0.66 *</b> | <b>0.71 **</b>           |                          |                  |
| Mean temperature (°C)                           | 0.42               | <b>0.67 *</b>   | -0.58          | <b>-0.74 **</b> | <b>0.78 **</b>       | <b>0.64 *</b>         | <b>-0.58 *</b> | -0.58          | <b>0.83 ***</b>          | <b>0.97 ***</b>          |                  |
| Mean wind speed (m/s)                           | -0.57              | -0.52           | 0.55           | <b>0.63 *</b>   | -0.23                | -0.22                 | 0.27           | -0.05          | -0.42                    | -0.10                    | -0.26            |

Table S4. Pearson correlations separately for male and female butterflies between the three dispersal measures and the explanatory adjusting and weather variables ( $n = 12$  years).

| Explanatory variable                      | Emigration |         | Residence time |         | Distance moved |         |
|-------------------------------------------|------------|---------|----------------|---------|----------------|---------|
|                                           | Males      | Females | Males          | Females | Males          | Females |
| <u>Adjusting variables</u>                |            |         |                |         |                |         |
| Number of occupied patches                | 0.61       | 0.32    | -0.41          | -0.22   | 0.81           | 0.48    |
| Metapopulation size                       | 0.82       | 0.26    | -0.60          | -0.54   | 0.79           | 0.21    |
| Recapture rate                            | -0.78      | -0.02   | 0.49           | 0.39    | -0.57          | 0.02    |
| <u>Weather variables</u>                  |            |         |                |         |                |         |
| Average cloudiness                        | -0.77      | -0.48   | 0.89           | 0.22    | -0.56          | -0.31   |
| Proportion of especially warm days        | 0.60       | 0.38    | -0.86          | -0.44   | 0.50           | 0.07    |
| Mean daily radiation (kJ/m <sup>2</sup> ) | 0.53       | 0.33    | -0.70          | -0.20   | 0.26           | 0.02    |
| Mean daily rainfall (mm)                  | -0.69      | -0.44   | 0.71           | 0.50    | -0.50          | -0.24   |
| Proportion of rainy days                  | -0.53      | 0.06    | 0.56           | 0.21    | -0.36          | -0.17   |
| Mean daily minimum temperature (°C)       | 0.72       | 0.24    | -0.64          | -0.44   | 0.82           | 0.46    |
| Mean daily maximum temperature (°C)       | 0.74       | 0.14    | -0.78          | -0.33   | 0.60           | 0.18    |
| Mean temperature (°C)                     | 0.82       | 0.20    | -0.79          | -0.38   | 0.73           | 0.28    |
| Mean wind speed (m/s)                     | -0.54      | -0.69   | 0.55           | 0.16    | -0.39          | -0.38   |

Table S5. Summary of the modelling results of the factors explaining annual variation in the three dispersal measures, when the three adjusting variables, (a) metapopulation size, (b) number of occupied patches and (c) recapture rate, were forced in the models one at a time before the addition of significant weather variables. Emigration rate was modelled using a generalized linear model (GLM) with a binomial error distribution and a logit link function. Annual average residence time and distance moved were modelled based on multiple linear regression models.

(a) Metapopulation size as a forced adjusting variable

**GLM with binomial error distribution**

| Variable                                                | Coefficient | Df | Residual deviance | P      |
|---------------------------------------------------------|-------------|----|-------------------|--------|
| <b>Emigration rate</b>                                  |             |    |                   |        |
| Null model                                              |             | 11 | 55.07             |        |
| Metapopulation size                                     | 0.00104     | 10 | 17.58             | <0.001 |
| Mean daily solar radiation                              | 0.00011     | 9  | 7.99              | 0.002  |
| <i>85% of the total deviance explained by the model</i> |             |    |                   |        |

**Multiple linear regressions**

| Variable                           | coefficient             | t     | P     |
|------------------------------------|-------------------------|-------|-------|
| <b>Residence time</b>              |                         |       |       |
| Metapopulation size                | -0.00031                | -0.42 | 0.685 |
| Average cloudiness                 | 1.199                   | 3.15  | 0.014 |
| Proportion of especially warm days | -11.25                  | -4.66 | 0.002 |
| <i>n, F, P, R<sup>2</sup></i>      | 12, 31.31, <0.001, 0.89 |       |       |
| <b>Distance moved</b>              |                         |       |       |
| Metapopulation size                | 0.053                   | 3.49  | 0.006 |
| <i>n, F, P, R<sup>2</sup></i>      | 12, 12.17, 0.006, 0.50  |       |       |

(b) Number of occupied patches as a forced adjusting variable

**GLM with binomial error distribution**

| Variable                                                | Coefficient | Df | Residual deviance | P      |
|---------------------------------------------------------|-------------|----|-------------------|--------|
| <b>Emigration rate</b>                                  |             |    |                   |        |
| Null model                                              |             | 11 | 55.07             |        |
| Number of occupied patches                              | 0.070       | 10 | 31.39             | <0.001 |
| Average cloudiness                                      | -0.593      | 9  | 7.78              | <0.001 |
| <i>86% of the total deviance explained by the model</i> |             |    |                   |        |

**Multiple linear regressions**

| Variable                           | coefficient             | t     | P     |
|------------------------------------|-------------------------|-------|-------|
| <b>Residence time</b>              |                         |       |       |
| Number of occupied patches         | -0.014                  | -0.19 | 0.853 |
| Average cloudiness                 | 1.24                    | 3.35  | 0.010 |
| Proportion of especially warm days | -11.44                  | -4.81 | 0.001 |
| <i>n, F, P, R<sup>2</sup></i>      | 12, 30.73, <0.001, 0.89 |       |       |
| <b>Distance moved</b>              |                         |       |       |
| Number of occupied patches         | 5.17                    | 4.34  | 0.002 |
| Mean temperature                   | 7.70                    | 2.63  | 0.027 |
| <i>n, F, P, R<sup>2</sup></i>      | 12, 21.36, <0.001, 0.79 |       |       |

(c) Recapture rate as a forced adjusting variable

**GLM with binomial error distribution**

| Variable                                                | Coefficient | Df | Residual deviance | P      |
|---------------------------------------------------------|-------------|----|-------------------|--------|
| <b>Emigration rate</b>                                  |             |    |                   |        |
| Null model                                              |             | 11 | 55.07             |        |
| Recapture rate                                          | -0.013      | 10 | 19.69             | <0.001 |
| Mean temperature                                        | 0.195       | 9  | 9.35              | 0.001  |
| Mean wind speed                                         | -0.519      | 8  | 4.97              | 0.036  |
| <i>91% of the total deviance explained by the model</i> |             |    |                   |        |

**Multiple linear regressions**

| Variable                           | coefficient            | t     | P      |
|------------------------------------|------------------------|-------|--------|
| <b>Residence time</b>              |                        |       |        |
| Recapture rate                     | 0.056                  | 4.03  | 0.003  |
| Proportion of especially warm days | -14.64                 | -8.23 | <0.001 |
| <i>n, F, P, R<sup>2</sup></i>      | 12, 56.0, <0.001, 0.91 |       |        |
| <b>Distance moved</b>              |                        |       |        |
| Recapture rate                     | -0.08                  | -0.18 | 0.861  |
| Mean daily minimum temperature     | 21.02                  | 3.20  | 0.011  |
| <i>n, F, P, R<sup>2</sup></i>      | 12, 9.33, 0.006, 0.60  |       |        |

### Movement variables

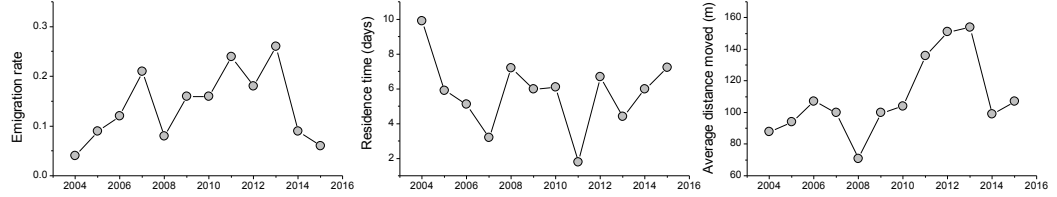

### Adjusting variables

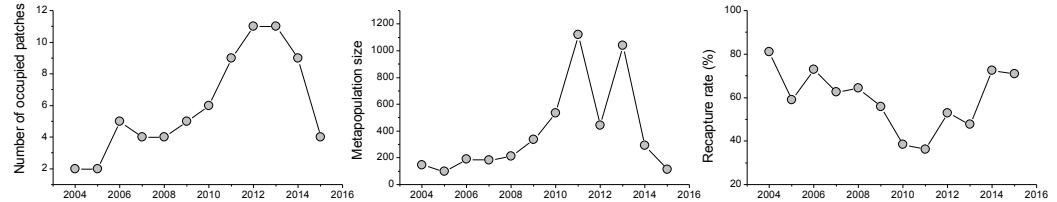

### Weather variables

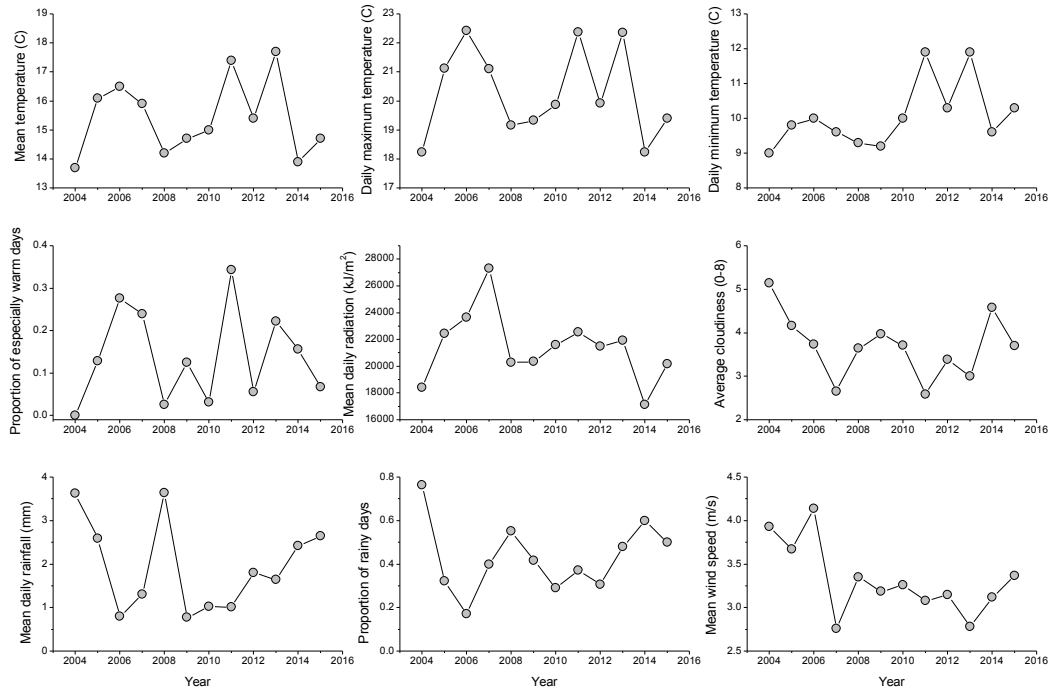

Fig. S1. Illustrations of the observed time series for all dispersal, adjusting and weather variables used in the dispersal analyses. There is no significant linear temporal trend in the variables except in two cases: the number of occupied patches ( $p = 0.012$ ) and average wind speed ( $p = 0.045$ ).

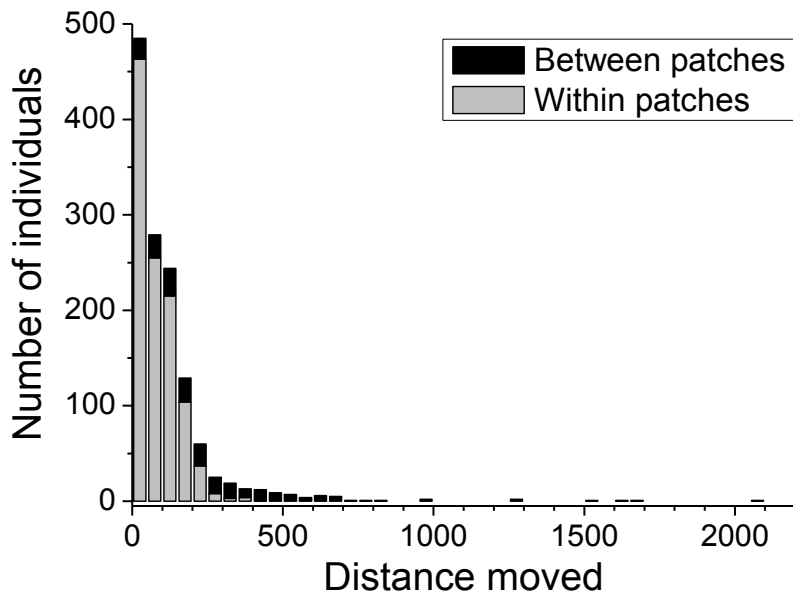

Fig. S2. Distribution of observed distances moved by Clouded Apollo during the MRR studies in 2004–2015 ( $n = 1,308$  individuals). Within- (light grey) and between-patch (black bars) movements have been shown with differing colours.
